# Supplementary material
Source: PubMed Central journal article supplement (PMC3107309)
Supplement: 1105682108_pnas.1105682108_SI.pdf [file 1105682108_pnas.1105682108_SI.pdf]

signs of  $\Delta\omega(^1\text{H})$  and  $\Delta\omega(^{15}\text{N})$  double the number of unique solutions. The results of local LM optimization after each trial were only retained if an improvement in  $\chi^2$  was realized.

A clustering algorithm was used to define groups of residues that exchange with similar kinetics. Initial clusters of  $^{15}\text{N}$  relaxation dispersion curves (pH 4.75) were formed by fitting the entire  $^{15}\text{N}$  relaxation dispersion dataset to a global two-state model and comparing the results of that fit to individual fits of each residue. Residues were removed from the global fit if the ratio  $\chi^2_{\text{Global}}/\chi^2_{\text{Individual}}$  exceeded 2.0. This technique was applied recursively to the resultant cluster, as well as the new clusters formed by the rejected residues until all residues could be fit with a value of  $\chi^2_{\text{Cluster}}$  less than double the value of  $\chi^2_{\text{Individual}}$ . The second step in clustering involved (i) identifying the core residues in each cluster, those with the highest data quality with  $R_{\text{ex}}$  values  $>4\text{ s}^{-1}$ , (ii) separately fitting the core residues in each cluster, and (iii) removing any of the remaining residues that could not be adequately fit using the rates and populations obtained solely from fits to the core residues. The final step incorporated an iterative process: (i) test the quality of fit of each residue with the kinetic parameters of each of the clusters, (ii) use the information from step (i) to move residues between clusters in order to reduce  $\chi^2$ , (iii) optimize the kinetic parameters of the new clusters, and (iv) repeat steps (i) through (iii) until no further improvements could be made.

#### Initial Studies using $^{15}\text{N}$ SQ Relaxation with Nondeuterated apoMb.

$^{15}\text{N}$  amide dispersion data acquired at pH 4.75, 35 °C using  $^{15}\text{N}$ -labeled apoMb could not be adequately fit using a global two-state exchange mechanism. Local and clustered fitting of the kinetic exchange parameters were tested in order to account for the additional complexity that was not well fit by a global two-state model. Local two-state fitting coupled with Monte Carlo error analysis resulted in a broad spectrum of poorly defined kinetic exchange rates. Clustered two-state fits were completely ineffective at separating independent two-state events. The inadequacy of the clustered two-state model is strong evidence for a mechanism in which individual residues sample more than two conformational states. In order to overcome the inadequacy of the two-state model, a three-site exchange model was optimized to fit the amide data at pH 4.75. Simultaneous global fitting of data at multiple temperatures (30, 35, and 40 °C) assisted in parameter determination. Although the three-state model significantly improved the quality of fit over the two states, the three-state kinetic exchange rates were not well defined by the multiple-temperature SQ  $^{15}\text{N}$  dispersion data alone.

**Two-State Versus Three-State Fitting of SQ, DQ, and ZQ Data.** The chemical shift parameters extracted from a global two-site exchange model unequivocally showed unfolding to a state that highly resembles the pH 4.1 molten globule (MG). Identification of the transient state as the MG intermediate was evident from the observed correlation between ( $\Delta\omega$ ) the chemical shift differences ( $\omega_{\text{MG}}$ : transient partially unfolded state) – ( $\omega_{\text{N}}$ : ground-state) extracted from the fits of the  $R_2$  dispersion data, and the absolute value of the chemical shift differences ( $|\Delta\delta_{\text{N,MG}}|$ ) determined from HSQC and HNCQ spectra under equilibrium conditions [pH 4.1, 50 °C, 10% EtOH (11) for MG, and pH 4.75, 35 °C for native (N)]. Although the correlation between  $\Delta\omega$  and  $\Delta\delta_{\text{MG,N}}$  suggests that some meaningful information can be extracted from the two-state model, 15% of the dataset is fit poorly by the global two-state model. Fitting to the three-state model leads to a 19 and 25% reduction in the global reduced  $\chi^2$  and AIC criterion, respectively.

The folding rates for the MG to N transition ( $250\text{ s}^{-1}$ ) extracted from two-state fits (Table S1) to the amide dispersion data ( $^1\text{H}$  SQ,  $^{15}\text{N}$  SQ, DQ, ZQ) were notably different from those determined by rapid-mixing kinetic experiments ( $20\text{ s}^{-1}$ ) (12). The

same data fitted to a three-state model yielded a folding rate ( $26\text{ s}^{-1}$ ) close to that determined from the fast kinetics experiments, offering additional support for the use of a three-state model and underscoring the importance of modeling all significant transient states, including the highly native-like I1 state.

The magnitude of  $\Delta\omega_{\text{N,I1}}$  is generally small in comparison to  $\Delta\omega$  for the N to MG transition (Fig. S5), yet I1 has a relatively large population (9%) and thus has a significant effect on the shape of the dispersion curves. Even residues with very small  $\Delta\omega_{\text{N,I1}}$  values display the effects of the N to I1 transition as an additional upward extension of  $R_2^{\text{diff}}$  in the lowest frequency ( $1/\tau_{\text{cp}}$ ) region of the dispersion curve.

**Three-State Fitting of  $^{13}\text{CO}/^{15}\text{N}$   $R_2$  Dispersion at pH 4.75.** A global two-state model yields moderate- to high-quality fits to  $^{13}\text{CO}$  and  $^{15}\text{N}$  datasets using a single set of exchange rates for both probes. A three-state model, however, yields a 30 and 70% reduction in global  $\chi^2$  and AIC values, respectively, while the main folding rate (MG  $\rightarrow$  I1) is well determined by the three-state model ( $17\text{ s}^{-1}$ ) and significantly overestimated ( $250\text{ s}^{-1}$ ) by a two-state model (Table S1).

Global fitting of SQ  $^{13}\text{CO}$  and  $^{15}\text{N}$   $R_2$  dispersion data from a single sample required imposition of local parameter ( $\Delta\omega_{\text{N,I1}}$ ) constraints to narrow the search for the three-state  $\Delta\omega$  parameters. Because  $\Delta\omega_{\text{N,I1}}$  at pH 4.75 showed close similarity to  $\Delta\omega$  from pH 5.5 (Fig. S3), the  $\Delta\omega$  parameters from two-state fits at pH 5.5 were used as constraints to fit the  $^{15}\text{N}/^{13}\text{CO}$  data at pH 4.75.  $\Delta\omega_{\text{N,I1}}$  parameters for both nuclei were bound to a range of  $\pm 20\%$  of  $\Delta\omega$  at pH 5.5 for all residues that yielded reliable  $\Delta\omega$  values at pH 5.5. In contrast to the well-defined kinetic exchange rates extracted from the  $^1\text{H}/^{15}\text{N}$  dataset, several combinations of the global kinetic rates were found to yield fits of similar quality to the  $^{15}\text{N}/^{13}\text{CO}$  dataset. This uncertainty was quantified using a 10,000-point grid search of the kinetic parameter space. The starting conditions for LM optimization were varied through the apparent range of uncertainty for each of the global kinetic parameters. Full optimization for each set of starting conditions yielded a distribution of final parameter states and global  $\chi^2$  values that illustrated the degree of convergence and uncertainty for each parameter. The average and standard deviation of kinetic and  $\Delta\omega$  parameters were extracted from the group of final parameters that yield high-quality global fits.

**Comparison of Kinetic Models Using Data from Different Samples.** Preliminary experiments showed that aliphatic deuteration increased the extent of unfolding at pH  $< 5$  and made it necessary to increase the pH of a deuterated sample by 0.2 pH units above that of a nondeuterated sample in order to attain a similar magnitude of  $R_{\text{ex}}$ . As a result,  $^{13}\text{CO}$  and amide dispersion data were recorded at different pH [4.75 and 4.95, respectively, for nondeuterated ( $^{15}\text{N}/^{13}\text{C}$ -labeled) and deuterated ( $^{15}\text{N}$ -labeled) apoMb samples]. The low buffering capacity of 5 mM acetate (the ionic strength must be kept low to limit the propensity of apoMb to aggregate) and the buffering capacity of apoMb itself at 600–700  $\mu\text{M}$  also contribute to the challenge of obtaining reproducible  $R_{\text{ex}}$  values for independently prepared apoMb samples, even with the same isotope-labeling scheme. The equilibrium between the N and MG states is highly sensitive to pH and ionic strength at the edge of the unfolding transition (pH 4.75–4.95). As a result, minor variations in solution conditions have large effects on kinetic rate constants and the populations of the exchanging species. In order to address the question of whether the  $^{13}\text{C}$  and amide probes monitor identical conformational exchange events, we acquired both sets of dispersion data on the same ( $^{15}\text{N}/^{13}\text{C}$ -labeled) sample and found that they were well fit using a single set of global three-state exchange kinetics.

**Contribution of Intermolecular Interactions.** The potential contribution of intermolecular interactions to the observed relaxation dispersion data was evaluated. N-state samples at or below 700  $\mu\text{M}$  did not aggregate within the timeframe of the experiments, as evidenced by the lack of time-dependent changes in NMR peak intensities. Protein concentration dependence of  $R_{\text{ex}}$  was investigated by diluting a sample of pH 4.75 apoMb across a range of concentrations (600–300  $\mu\text{M}$ ). Because of the buffering capacity of apoMb in this concentration range, small pH corrections were necessary to account for a change in pH upon dilution. Given the high sensitivity of the N  $\rightleftharpoons$  MG equilibrium to pH and ionic strength, and the difference in ionic strength and buffering capacity between the 600- and 300-mM samples, the amplitude and pattern of  $R_{\text{ex}}$  between 600- and 300- $\mu\text{M}$  samples are within reasonable agreement. The lack of significant concentration dependence of  $R_{\text{ex}}$  supports the use of a completely monomeric partial-unfolding model.

**Dihedral Angle Analysis with TALOS+** Kinetic and  $\Delta\omega$  parameters shown in Table 1 and Figs. 2 and 3 were extracted from a core set of the highest-quality relaxation dispersion curves characterized by significant  $R_{\text{ex}}$  and minimal random scatter in the dispersion curve. The remaining dispersion curves were analyzed to extract  $\Delta\omega$  by fitting them to a constrained set of kinetics as defined by the higher-quality portion of the dataset. Excluding curves that are not analyzable because of excessive random scatter, or those that are extracted from peaks with significant overlap, all available  $\Delta\omega$  parameters were included in the structural analysis of the transient MG state (Fig. 5). TALOS+ (13) was

used to predict bond angles and secondary structure in the transient MG state. The chemical shifts used as input for TALOS+ were calculated with a combination of the N-state chemical shifts ( $^1\text{H}^{\text{N}}$ ,  $^{15}\text{N}$ ,  $^{13}\text{CO}$ ), and  $\Delta\omega_{\text{N,MG}}$  extracted from three-state relaxation dispersion analyses at pH 4.75–4.95 as described in Table S2.

**Comparison of Transient and Equilibrium MGs.** Within the limits of available secondary structure predictions, the segments of helical structure largely agree with TALOS+ (13) predictions of secondary structure in the pH 4.1 MG state, based on  $^{15}\text{N}$ ,  $^1\text{H}^{\text{N}}$ ,  $^1\text{H}^{\alpha}$ ,  $^{13}\text{CO}$ ,  $^{13}\text{C}_{\beta}$ , and  $^{13}\text{C}_{\alpha}$  chemical shifts (11) (pH 4.1, 50 °C). The helical boundaries of the A, B, nonnative D–E, G, and H helices in the transient and pH 4.1 MG states are either identical (B, D–E, G, H) or one residue shorter (A) in the pH 4.1 MG. The C and E helices are shorter by two (42, 43) and three (68, 69, 70) residues, respectively, in the pH 4.1 MG. These small differences coincide with the lowest population and most dynamic helical structure, and they expose a minor pH-dependent plasticity in the boundaries of the MG-state helical structure. Salient differences exist between the populations of the predicted helical segments common between the two structures based on  $^{13}\text{CO}$  chemical shifts. The population of helix in the transient MG state is on average 13% greater than that of the pH 4.1 MG state. This difference is reflected in a slope of 0.88 in the linear regression between  $\Delta\omega_{\text{N,MG}}$  ( $^{13}\text{CO}$ ) and  $\Delta\delta_{\text{N,MG}}$  ( $^{13}\text{CO}$ ) for residues in regions that are helical in both transient and pH 4.1 MG states. The chemical shifts depict an MG state that has minor and localized pH dependence of the helical segments.

- Nishimura C, Dyson HJ, Wright PE (2006) Identification of native and non-native structure in kinetic folding intermediates of apomyoglobin. *J Mol Biol* 355:139–156.
- Jennings PA, Stone MJ, Wright PE (1995) Overexpression of myoglobin and assignment of the amide, C $\alpha$  and C $\beta$  resonances. *J Biomol NMR* 6:271–276.
- Eliezer D, Wright PE (1996) Is apomyoglobin a molten globule? Structural characterization by NMR. *J Mol Biol* 263:531–538.
- Grzesiek S, Bax A (1992) Correlating backbone amide and side chain resonances in larger proteins by multiple relayed triple resonance NMR. *J Am Chem Soc* 114:6291–6293.
- Grzesiek S, Bax A (1992) Improved 3D triple-resonance NMR techniques applied to a 31 kDa protein. *J Magn Reson* 96:432–440.
- Tollinger M, Skrynnikov NR, Mulder FA, Forman-Kay JD, Kay LE (2001) Slow dynamics in folded and unfolded states of an SH3 domain. *J Am Chem Soc* 123:11341–11352.
- Sugase K, Dyson HJ, Wright PE (2007) Mechanism of coupled folding and binding of an intrinsically disordered protein. *Nature* 447:1021–1025.
- Jen J (1978) Chemical exchange and Nmr T2 relaxation—Multisite case. *J Magn Reson* 30:111–128.
- Motulsky H, Christopoulos A (2004) *Fitting Models to Biological Data Using Linear and Nonlinear Regression: A Practical Guide to Curve Fitting* (Oxford Univ Press, Oxford).
- Neudecker P, Korzhnev D, Kay L (2006) Assessment of the effects of increased relaxation dispersion data on the extraction of 3-site exchange parameters characterizing the unfolding of an SH3 domain. *J Biomol NMR* 34:129–135.
- Eliezer D, Chung J, Dyson HJ, Wright PE (2000) Native and non-native structure and dynamics in the pH 4 intermediate of apomyoglobin. *Biochemistry* 39:2894–2901.
- Uzawa T, et al. (2004) Collapse and search dynamics of apomyoglobin folding revealed by submillisecond observations of  $\alpha$ -helical content and compactness. *Proc Natl Acad Sci USA* 101:1171–1176.
- Shen Y., Delaglio F, Cornilescu G, Bax A (2009) TALOS+: A hybrid method for predicting protein backbone torsion angles from NMR chemical shifts. *J Biomol NMR* 44: 213–223.







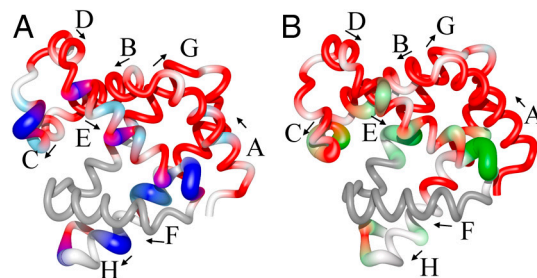

**Fig. S4.** Amide and  $^{13}\text{C}$ O chemical shift differences ( $\Delta\omega$ ) between the native and transient I1 states derived from three-state fits to relaxation dispersion data at pH 4.75 ( $^{13}\text{C}$ O) and 4.95 (amide). (A)  $^{15}\text{N}$   $\Delta\omega_{N,I1}$  shifts mapped to the structure of holoMb (Protein Data Bank ID code 1MBC). Values of  $\Delta\omega_{N,I1}$  greater than the mean are colored blue; the amplitude is indicated by tube thickness and color saturation. The gray tubes represent the F helix and the first turn of the G helix, and the white tubes represent regions that are associated with resonances that are either broadened beyond detection or that yield  $R_2$  dispersion curves that are too noisy to fit. (B)  $^{13}\text{C}$ O  $\Delta\omega_{N,I1}$  shifts mapped to the structure using the same scheme as in A except that green is used for values greater than the mean. This figure was prepared using MolMol (1).

1 Koradi R, Billeter M, Wüthrich K (1996) MOLMOL: A program for display and analysis of macromolecular structures. *J Mol Graph* 14:51–55.

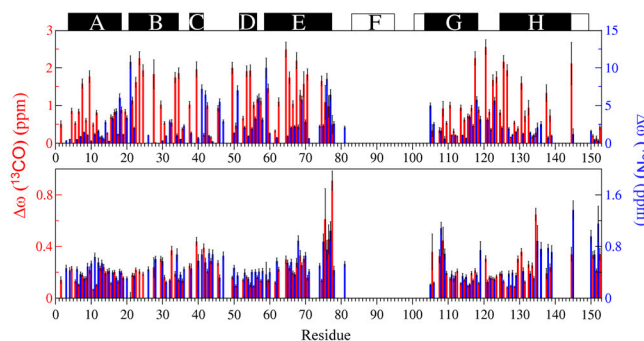

**Fig. S5.** The absolute value of  $\Delta\omega$  obtained from simultaneous fits to  $^{13}\text{C}$ O (red) and  $^{15}\text{N}$  (blue)  $R_2$  dispersion curves acquired on  $^1\text{H}/^{15}\text{N}/^{13}\text{C}$ -labeled apoMb at pH 4.75, 35 °C.  $\Delta\omega$  values for the  $\text{N} \rightleftharpoons \text{MG}$  and  $\text{N} \rightleftharpoons \text{I1}$  transitions are shown in A and B, respectively. Parameters and error bars were determined as described in *S1 Text*. The bars at the top of the figure represent helical boundaries as defined in Fig. S1.

**Table S1. Kinetic parameters from a two-state analysis of apoMb transient unfolding and refolding**

| Probe                                 | $K_{\text{ex}}, \text{s}^{-1}$ | $k_{\text{N,MG}}, \text{s}^{-1}$ | $k_{\text{MG,N}}, \text{s}^{-1}$ | $P_{\text{N}}$  | $P_{\text{MG}}$ |
|---------------------------------------|--------------------------------|----------------------------------|----------------------------------|-----------------|-----------------|
| $^{15}\text{N}/^1\text{H}^*$          | $441 \pm 16$                   | $27 \pm 3$                       | $414 \pm 16$                     | $0.94 \pm 0.05$ | $0.06 \pm 0.01$ |
| $^{13}\text{C}/^{15}\text{N}^\dagger$ | $270 \pm 20$                   | $14 \pm 1$                       | $250 \pm 20$                     | $0.95 \pm 0.00$ | $0.05 \pm 0.00$ |

\*Parameters from a two-state fit to  $R_2$  relaxation dispersion data as shown in Fig. 2 (pH 4.95, 35 °C) using four types of amide coherences ( $^1\text{H}$ -SQ,  $^{15}\text{N}$ -SQ,  $^1\text{H}/^{15}\text{N}$ -DQ,  $^1\text{H}/^{15}\text{N}$ -ZQ). Uncertainty was determined using Monte Carlo sampling.

$^\dagger$ Parameters from a two-state global fit to  $^{13}\text{C}$ O and  $^{15}\text{N}$   $R_2$  relaxation dispersion data shown in Fig. 3 (pH 4.75, 35 °C). Uncertainty was determined using Monte Carlo sampling.

**Table S2.  $^{15}\text{N}$  chemical shifts (ppm) derived from three-state global fits to four types of amide relaxation dispersion curves (SQ- $^1\text{H}$ , SQ- $^{15}\text{N}$ , ZQ, DQ) acquired for perdeuterated apoMb at pH 4.95, 35 °C**

| Residue no. | $ \Delta\omega_{\text{N,MG}}(^{15}\text{N}) ^*$ | Error* | $ \Delta\omega_{\text{N,I1}}(^{15}\text{N}) ^*$ | Error* | Data quality* | $\omega_{\text{N}}^\dagger$ pH 4.95, 35 °C | $\Delta\delta_{\text{N,MG}}(^{15}\text{N})^\ddagger$ (pH 4.95, 35 °C)–(pH 4.1, 50 °C) | $\omega_{\text{TrMG}}^{15\text{N}}^\S$ |
|-------------|-------------------------------------------------|--------|-------------------------------------------------|--------|---------------|--------------------------------------------|---------------------------------------------------------------------------------------|----------------------------------------|
| 2           | 0.23                                            | 0.02   | 0.24                                            | 0.00   | S             | 125.20                                     | 0.10                                                                                  | 125.35                                 |
| 3           | 0.31                                            | 0.03   | 0.26                                            | 0.03   | K             | 118.14                                     | 0.92                                                                                  | 118.22                                 |
| 4           | 0.57                                            | 0.04   | 0.18                                            | 0.02   | K             | 121.02                                     | –0.70                                                                                 | 121.97                                 |
| 5           | 0.00                                            | 0.03   | 0.20                                            | 0.00   | S             | 106.26                                     | –0.46                                                                                 | 106.64                                 |
| 6           | 0.05                                            | 0.10   | 0.35                                            | 0.06   | K             | 122.64                                     | 1.29                                                                                  | 122.96                                 |
| 7           | 0.91                                            | 0.07   | 0.08                                            | 0.05   | K             | 118.95                                     | –0.90                                                                                 | 120.24                                 |
| 8           | 1.05                                            | 0.06   | 0.13                                            | 0.04   | K             | 116.55                                     | 0.46                                                                                  | 115.88                                 |
| 9           | 0.57                                            | 0.09   | 0.42                                            | 0.02   | K             | 119.48                                     | –0.74                                                                                 | 120.43                                 |
| 10          | 0.79                                            | 0.00   | 0.19                                            | 0.00   | S             | 119.05                                     | 0.32                                                                                  | 118.63                                 |
| 11          | 1.49                                            | 0.21   | 0.27                                            | 0.03   | K             | 119.06                                     | 0.72                                                                                  | 117.96                                 |
| 12          | 2.32                                            | 0.05   | 0.35                                            | 0.04   | K             | 119.35                                     | 2.50                                                                                  | 117.40                                 |
| 13          | 2.01                                            | 0.45   | 0.46                                            | 0.03   | K             | 117.52                                     | –1.57                                                                                 | 119.91                                 |
| 14          | 3.05                                            | 0.37   | 0.33                                            | 0.02   | K             | 122.87                                     | 2.27                                                                                  | 120.19                                 |
| 15          | 0.51                                            | 0.06   | 0.00                                            | 0.17   | K             | 118.10                                     | –1.00                                                                                 | 118.98                                 |



| Residue no. | $ \Delta\omega_{N,MG}({}^{15}\text{N}) ^{*}$ | Error* | $ \Delta\omega_{N,I1}({}^{15}\text{N}) ^{*}$ | Error* | Data quality* | $\omega_N^{\dagger}$ pH 4.95, 35 °C | $\Delta\delta_{N,MG}({}^{15}\text{N})^{\ddagger}$ (pH 4.95, 35 °C)–(pH 4.1, 50 °C) | $\omega_{\text{TrMG}}^{\S}$ ${}^{15}\text{N}$ |
|-------------|----------------------------------------------|--------|----------------------------------------------|--------|---------------|-------------------------------------|------------------------------------------------------------------------------------|-----------------------------------------------|
| 115         | 0.56                                         | 0.03   | 0.11                                         | 0.06   | K             | 120.03                              | –0.19                                                                              | 120.96                                        |
| 116         | 0.14                                         | 0.02   | 0.00                                         | 0.00   | K             | 115.25                              | –0.47                                                                              | 115.77                                        |
| 117         | 2.92                                         | 0.15   | 0.00                                         | 0.08   | K             | 112.39                              | –2.21                                                                              | 115.69                                        |
| 118         | 4.88                                         | 0.18   | 0.24                                         | 0.02   | K             | 115.60                              | –5.00                                                                              | 120.86                                        |
| 119         | 4.01                                         | 0.59   | 0.41                                         | 0.03   | K             | 114.81                              | –3.92                                                                              | 119.20                                        |
| 121         | 2.62                                         | 0.07   | 0.00                                         | 0.00   | K             | 106.09                              | –2.50                                                                              | 109.09                                        |
| 122         | 3.66                                         | 0.18   | 0.13                                         | 0.07   | K             | 117.22                              | –2.25                                                                              | 121.26                                        |
| 123         | 0.04                                         | 0.06   | 0.10                                         | 0.03   | K             | 123.12                              | 3.27                                                                               | 123.46                                        |
| 124         | 0.72                                         | 0.04   | 0.06                                         | 0.04   | K             | 109.53                              | 0.56                                                                               | 109.19                                        |
| 125         | 0.33                                         | 0.02   | 0.27                                         | 0.01   | K             | 120.98                              | –1.87                                                                              | 121.69                                        |
| 126         | 0.59                                         | 0.02   | 0.00                                         | 0.00   | K             | 117.35                              | –0.25                                                                              | 118.32                                        |
| 127         | 1.08                                         | 0.04   | 0.13                                         | 0.04   | K             | 126.12                              | 2.14                                                                               | 125.42                                        |
| 128         | 1.06                                         | 0.12   | 0.18                                         | 0.03   | K             | 118.23                              | 1.01                                                                               | 117.54                                        |
| 129         | 1.77                                         | 0.18   | 0.13                                         | 0.02   | K             | 106.59                              | –1.63                                                                              | 108.74                                        |
| 130         | 0.17                                         | 0.00   | 0.00                                         | 0.00   | K             | 124.10                              | 0.50                                                                               | 124.30                                        |
| 131         | 0.87                                         | 0.09   | 0.37                                         | 0.03   | K             | 116.69                              | –0.90                                                                              | 117.94                                        |
| 132         | 0.35                                         | 0.09   | 0.27                                         | 0.04   | K             | 117.67                              | –0.30                                                                              | 118.39                                        |
| 133         | 1.24                                         | 0.06   | 0.26                                         | 0.01   | K             | 119.01                              | –1.21                                                                              | 120.63                                        |
| 134         | 0.06                                         | 0.06   | 0.28                                         | 0.02   | K             | 121.76                              | 0.03                                                                               | 122.07                                        |
| 135         | 2.32                                         | 0.54   | 0.92                                         | 0.00   | S             | 115.77                              | –1.83                                                                              | 118.47                                        |
| 136         | 1.24                                         | 0.00   | 1.19                                         | 0.00   | S             | 120.72                              | 1.62                                                                               | 119.86                                        |
| 137         | 2.38                                         | 0.30   | 0.45                                         | 0.04   | K             | 120.53                              | 1.06                                                                               | 118.53                                        |
| 138         | 6.10                                         | 0.24   | 0.81                                         | 0.04   | K             | 117.61                              | –1.11                                                                              | 124.09                                        |
| 139         | 0.16                                         | 0.04   | 0.52                                         | 0.03   | K             | 120.25                              | 1.53                                                                               | 120.48                                        |
| 140         | 0.36                                         | 0.04   | 0.05                                         | 0.02   | K             | 120.91                              | 1.82                                                                               | 120.93                                        |
| 141         | 1.26                                         | 0.00   | 0.19                                         | 0.00   | S             | 120.00                              | 0.53                                                                               | 119.11                                        |
| 144         | 2.61                                         | 0.39   | 1.05                                         | 0.07   | K             | 118.91                              | –0.19                                                                              | 121.89                                        |
| 145         | 0.55                                         | 0.40   | 1.18                                         | 0.05   | K             | 119.82                              | 2.22                                                                               | 119.64                                        |
| 149         | 2.89                                         | 0.00   | 0.76                                         | 0.00   | S             | 117.94                              | –1.16                                                                              | 121.21                                        |
| 150         | 1.70                                         | 1.11   | 1.13                                         | 0.08   | K             | 106.08                              | –1.01                                                                              | 108.16                                        |
| 151         | 0.36                                         | 0.00   | 0.36                                         | 0.01   | K             | 119.98                              | 0.51                                                                               | 120.00                                        |
| 153         | 0.04                                         | 0.03   | 0.29                                         | 0.01   | K             | 115.28                              | 0.68                                                                               | 115.61                                        |

\*Values of  $\Delta\omega_{N,MG}$  and  $\Delta\omega_{N,I1}$  were obtained by fitting the relaxation dispersion data to the three-state model  $N \rightleftharpoons I1 \rightleftharpoons MG$ . The two types of data quality reported in the table correspond to high-quality datasets (K) used in the determination of global three-state kinetic parameters, and (S) those that were incorporated into inferences about the structural content of the transient MG state but were not used to determine global kinetics. Parameters labeled with “S” were extracted from  $R_2$  dispersion curves that exhibited excessive scatter in one or more of the  $\text{SQ-}^1\text{H}$ ,  $\text{SQ-}^{15}\text{N}$ , ZQ, DQ  $R_2^{\text{eff}}$  vs  $1/\text{tcp}$  profiles or small  $R_{\text{ex}}$  values. In order to extract  $\Delta\omega$  parameters from the lower-quality datasets, the global kinetic rates were held constant to the values shown in Table 1, which were obtained from fits to the high-quality data (K). Uncertainties for the higher-quality data were determined using Monte Carlo sampling, whereas those associated with lower-quality data were determined from the covariance matrix of a single fit with kinetic parameters constrained as described above. The uncertainties of the lower-quality data are, therefore, significantly underestimated.

$\omega_N$  represents the ( ${}^{15}\text{N}$ ) chemical shift of native apoMb measured under identical sample conditions (pH 4.95, 35 °C) as those used to acquire relaxation dispersion data summarized by the chemical shifts in the table. Chemical shift assignments were transferred from published assignments at pH 6.1 (3) and verified as described in *Materials and Methods*. Chemical shift referencing is indirectly based on DSS (5,5-dimethylsilapentanesulfonate).

$\Delta\delta_{N,MG}^{\ddagger}$  was calculated as the difference between the native state (designated  $\omega_N$ ) and published MG-state chemical shifts (11), all referenced to DSS.

$\omega_{\text{TrMG}}^{\S}$  is the chemical shift of the transient MG state calculated from the native-state chemical shift ( $\omega_N$ ),  $\Delta\omega_{N,MG}$ , and  $\Delta\delta_{N,MG}^{\ddagger}$  ( $\omega_{\text{TrMG}}^{\text{TrMG}} = \omega_N - \text{sign}(\Delta\delta_{N,MG}^{\ddagger})|\Delta\omega_{N,MG}|$ ), where it is assumed that the sign of  $\Delta\omega_{N,MG}$  is the same as that of  $\Delta\delta_{N,MG}^{\ddagger}$ . This assumption is supported by the strong linear correlation between the magnitudes of  $\Delta\omega_{N,MG}$  and  $\Delta\delta_{N,MG}^{\ddagger}$  (Figs. 2 and 3) for three nuclei ( ${}^1\text{H}$ ,  ${}^{15}\text{N}$ ,  ${}^{13}\text{C}$ ).

**Table S3.  ${}^1\text{H}$  chemical shifts (ppm) derived from three-state global fits to four types of amide relaxation dispersion curves ( $\text{SQ-}^1\text{H}$ ,  $\text{SQ-}^{15}\text{N}$ , ZQ, DQ) acquired for perdeuterated apoMb at pH 4.95, 35 °C**

| Residue no. | $ \Delta\omega_{N,MG}({}^1\text{H}) ^{*}$ | Error* | $ \Delta\omega_{N,I1}({}^1\text{H}) ^{*}$ | Error* | Data quality* | $\omega_H^{\dagger}$ pH 4.95, 35 °C | $\Delta\delta_{N,MG}({}^1\text{H})^{\ddagger}$ (pH 4.95, 35 °C)–(pH 4.1, 50 °C) | $\omega_{\text{TrMG}}^{\S}$ ${}^1\text{H}$ |
|-------------|-------------------------------------------|--------|-------------------------------------------|--------|---------------|-------------------------------------|---------------------------------------------------------------------------------|--------------------------------------------|
| 2           | 0.00                                      | 0.00   | 0.01                                      | 0.01   | S             | 8.16                                | 0.15                                                                            | 8.26                                       |
| 3           | 0.09                                      | 0.01   | 0.05                                      | 0.00   | K             | 9.06                                | 0.73                                                                            | 9.07                                       |
| 4           | 0.10                                      | 0.00   | 0.00                                      | 0.00   | K             | 9.03                                | 0.35                                                                            | 9.02                                       |
| 5           | 0.02                                      | 0.02   | 0.01                                      | 0.01   | S             | 8.58                                | 0.18                                                                            | 8.67                                       |
| 6           | 0.03                                      | 0.00   | 0.00                                      | 0.00   | K             | 7.71                                | –0.04                                                                           | 7.84                                       |
| 7           | 0.16                                      | 0.01   | 0.07                                      | 0.00   | K             | 8.56                                | 0.32                                                                            | 8.50                                       |
| 8           | 0.07                                      | 0.02   | 0.11                                      | 0.00   | K             | 8.23                                | 0.26                                                                            | 8.25                                       |
| 9           | 0.20                                      | 0.01   | 0.00                                      | 0.00   | K             | 7.52                                | 0.14                                                                            | 7.43                                       |
| 10          | 0.00                                      | 0.00   | 0.00                                      | 0.00   | S             | 7.91                                | 0.16                                                                            | 8.01                                       |
| 11          | 0.86                                      | 0.02   | 0.03                                      | 0.00   | K             | 8.85                                | 0.88                                                                            | 8.09                                       |
| 12          | 0.31                                      | 0.01   | 0.09                                      | 0.00   | K             | 8.34                                | 0.47                                                                            | 8.13                                       |
| 13          | 0.36                                      | 0.03   | 0.08                                      | 0.00   | K             | 7.60                                | –0.40                                                                           | 8.07                                       |
| 14          | 0.29                                      | 0.01   | 0.00                                      | 0.00   | K             | 8.87                                | 0.48                                                                            | 8.67                                       |
| 15          | 0.40                                      | 0.01   | 0.00                                      | 0.00   | K             | 7.51                                | –0.39                                                                           | 8.01                                       |
| 16          | 0.43                                      | 0.09   | 0.06                                      | 0.00   | K             | 6.97                                | –0.41                                                                           | 7.50                                       |
| 17          | 1.32                                      | 0.06   | 0.01                                      | 0.00   | K             | 6.66                                | –1.09                                                                           | 8.07                                       |
| 18          | 0.67                                      | 0.05   | 0.00                                      | 0.00   | K             | 7.35                                | –0.39                                                                           | 8.12                                       |
